# Supplementary material for: The reaction mechanism of SO3 with the multifunctional compound ethanolamine and its atmospheric implications
Source: Royal Society of Chemistry journal article supplement (doi:10.1039/d4cp01543f), 2024-01-01
Supplement: d4cp01543f6.pdf [file d4cp01543f6.pdf]

## The reaction mechanism of SO<sub>3</sub> with the multifunctional compound ethanolamine and its atmospheric implications

Rui Wang<sup>a</sup>, Ruxue Mu<sup>a,‡</sup>, Zeyao Li<sup>a,‡</sup>, Yongqi Zhang<sup>a</sup>,  
Jihuan Yang<sup>a</sup>, Guanhua Wang<sup>a</sup>, Tianlei Zhang<sup>a,\*</sup>

<sup>a</sup> Institute of Theoretical and Computational Chemistry, Shaanxi Key Laboratory of Catalysis, School of Chemical & Environment Science, Shaanxi University of Technology, Hanzhong, Shaanxi, 723000, P. R. China

| S. NO  | Caption                                                                                                                                                                                                                                                                                                                                                                                                                                                                                                                                                                                                                                                               |
|--------|-----------------------------------------------------------------------------------------------------------------------------------------------------------------------------------------------------------------------------------------------------------------------------------------------------------------------------------------------------------------------------------------------------------------------------------------------------------------------------------------------------------------------------------------------------------------------------------------------------------------------------------------------------------------------|
| S3     | <b>Fig. S1</b> Schematic potential energy surfaces for the reactions of SO <sub>3</sub> + C <sub>2</sub> H <sub>5</sub> OH and SO <sub>3</sub> + C <sub>2</sub> H <sub>5</sub> NH <sub>2</sub> at the CCSD(T)-F12/cc-pVTZ-F12//M06-2X/6-311++G(2df,2pd) level                                                                                                                                                                                                                                                                                                                                                                                                         |
| S4     | <b>Fig. S2</b> Schematic potential energy surface for the reaction of SO <sub>3</sub> + 2H <sub>2</sub> O at the CCSD(T)-F12/cc-pVTZ-F12//M06-2X/6-311++G(2df,2pd) level                                                                                                                                                                                                                                                                                                                                                                                                                                                                                              |
| S5     | <b>Fig. S3</b> The optimized geometrical structures for NH <sub>2</sub> CH <sub>2</sub> CH <sub>2</sub> OSO <sub>3</sub> <sup>-</sup> and HOCH <sub>2</sub> CH <sub>2</sub> NH <sub>2</sub> <sup>+</sup> ⋯SO <sub>3</sub> <sup>-</sup> ion at the M06-2X/6-311++G(2df,2pd) level                                                                                                                                                                                                                                                                                                                                                                                      |
| S6     | <b>Fig. S4</b> NBO charges of SO <sub>3</sub> <sup>-</sup> ⋯ <sup>+</sup> NH <sub>2</sub> CH <sub>2</sub> CH <sub>2</sub> OH and SO <sub>3</sub> <sup>-</sup> ⋯ <sup>+</sup> NH <sub>2</sub> CH <sub>2</sub> CH <sub>2</sub> OH⋯H <sub>2</sub> O in the gas phase optimized at the M06-2X/6-311++G(2df,2pd) level and the NBO charges of ring complexes of SO <sub>3</sub> <sup>-</sup> ⋯ <sup>+</sup> NH <sub>2</sub> CH <sub>2</sub> CH <sub>2</sub> OH⋯(H <sub>2</sub> O) <sub>2</sub> and SO <sub>3</sub> <sup>-</sup> -OCH <sub>2</sub> CH <sub>2</sub> NH <sub>3</sub> <sup>+</sup> on water droplet optimized with ONIOM method (M06-2X/6-311++G(2df,2pd):pm6) |
| S7     | <b>Fig. S5</b> Computed electrostatic potential mapped molecular van der Waals (vdW) surfaces of SO <sub>3</sub> with OH and NH <sub>2</sub> moieties HOCH <sub>2</sub> CH <sub>2</sub> NH <sub>2</sub> molecules at the M06-2X/6-311++G(2df,2pd) level                                                                                                                                                                                                                                                                                                                                                                                                               |
| S8-9   | <b>Table S1</b> The Energy barriers ( $\Delta E$ ) and unsigned error (UE) (kcal·mol <sup>-1</sup> ) for the SO <sub>3</sub> + HOCH <sub>2</sub> CH <sub>2</sub> NH <sub>2</sub> reaction at different theoretical methods with zero-point energy (ZPE) correction                                                                                                                                                                                                                                                                                                                                                                                                    |
| S10-11 | <b>Table S2</b> Relative energies ( $\Delta E$ and $\Delta(E + ZPE)$ /(kcal·mol <sup>-1</sup> )), enthalpies ( $\Delta H$ /(kcal·mol <sup>-1</sup> )), entropy (S(298 K)/(cal·mol <sup>-1</sup> ·K <sup>-1</sup> )) and Gibbs free energies ( $\Delta G$ (298 K)/(kcal·mol <sup>-1</sup> )) for the reaction of SO <sub>3</sub> with C <sub>2</sub> H <sub>5</sub> OH and C <sub>2</sub> H <sub>5</sub> NH <sub>2</sub> , along with the reactions between SO <sub>3</sub> and the OH and NH <sub>2</sub> moieties of HOCH <sub>2</sub> CH <sub>2</sub> NH <sub>2</sub> without and with H <sub>2</sub> O                                                             |
| S12    | <b>Table S3</b> Equilibrium coefficients (cm <sup>3</sup> ·molecule <sup>-1</sup> ) for the SO <sub>3</sub> ⋯H <sub>2</sub> O and HOCH <sub>2</sub> CH <sub>2</sub> NH <sub>2</sub> ⋯H <sub>2</sub> O complexes within 212.6-320.0 K                                                                                                                                                                                                                                                                                                                                                                                                                                  |
| S13    | <b>Table S4</b> Concentrations (molecules·cm <sup>-3</sup> ) for the SO <sub>3</sub> ⋯H <sub>2</sub> O and HOCH <sub>2</sub> CH <sub>2</sub> NH <sub>2</sub> ⋯H <sub>2</sub> O complexes within 212.6-320.0 K                                                                                                                                                                                                                                                                                                                                                                                                                                                         |
| S14-15 | <b>Table S5</b> Rate coefficients (cm <sup>3</sup> ·molecule <sup>-1</sup> ·s <sup>-1</sup> ) for the SO <sub>3</sub> + HOCH <sub>2</sub> CH <sub>2</sub> NH <sub>2</sub> reaction without and with H <sub>2</sub> O with HIR treatment calculated by master equation within 212.6-320.0 K                                                                                                                                                                                                                                                                                                                                                                            |
| S16    | <b>Table S6</b> Rate coefficients (cm <sup>3</sup> ·molecule <sup>-1</sup> ·s <sup>-1</sup> ) for the SO <sub>3</sub> + HOCH <sub>2</sub> CH <sub>2</sub> NH <sub>2</sub> reaction without and with H <sub>2</sub> O calculated within 212.6-320.0 K                                                                                                                                                                                                                                                                                                                                                                                                                  |

\* Corresponding authors. Tel: +86-0916-2641083, Fax: +86-0916-2641083.  
E-mail: ztianlei88@l63.com (T. L. Zhang)

‡ Ruxue Mu and Zeyao Li have contributed equally to this work.

|        |                                                                                                                                                                                                                                                                                                                                                                                                                                       |
|--------|---------------------------------------------------------------------------------------------------------------------------------------------------------------------------------------------------------------------------------------------------------------------------------------------------------------------------------------------------------------------------------------------------------------------------------------|
| S17-18 | <b>Table S7</b> The high-pressure limiting rate coefficients ( $\text{cm}^3 \cdot \text{molecule}^{-1} \cdot \text{s}^{-1}$ ) for the reaction of $\text{SO}_3$ with $\text{C}_2\text{H}_5\text{OH}$ and $\text{C}_2\text{H}_5\text{NH}_2$ , along with the reactions between $\text{SO}_3$ and the OH and $\text{NH}_2$ moieties of $\text{HOCH}_2\text{CH}_2\text{NH}_2$ without and with $\text{H}_2\text{O}$ within 212.6-320.0 K |
| S19    | <b>Table S8</b> Rate coefficients ( $\text{cm}^3 \cdot \text{molecule}^{-1} \cdot \text{s}^{-1}$ ) for the reaction of $\text{SO}_3$ with $\text{C}_2\text{H}_5\text{OH}$ , $\text{C}_2\text{H}_5\text{NH}_2$ and $2\text{H}_2\text{O}$ calculated by master equation within 212.6-320.0 K                                                                                                                                            |
| S20    | <b>Fig. S6</b> The dynamic trajectories of the gas-phase reaction of $\text{SO}_3$ with OH and $\text{NH}_2$ moieties of MEA without and with $\text{H}_2\text{O}$                                                                                                                                                                                                                                                                    |
| S21    | <b>Fig. S7</b> The z coordinates of $\text{SO}_3$ as the function of simulation time (a) the z coordinates of $\text{SO}_3$ molecule as the function of simulation time; (b) the density profile of water and (c) the pie chart with the occurrence percentages of $\text{SO}_3$ molecule at the air-water interface and in water phase                                                                                               |
| S22    | <b>Fig. S8</b> The z coordinates of MEA as the function of simulation time (a) the z coordinates of MEA molecule as the function of simulation time; (b) the density profile of water and (c) the pie chart with the occurrence percentages of MEA molecule at the air-water interface, in water phase and gas phase                                                                                                                  |
| S23    | <b>Fig. S9</b> The simulated trajectories of the formation of $\text{HOCH}_2\text{CH}_2\text{NH}_2$ and $\text{NH}_2\text{CH}_2\text{CH}_2\text{OH}$ molecules on water droplet                                                                                                                                                                                                                                                       |
| S24    | <b>Fig. S10</b> The simulated trajectories of the formation of $\text{SO}_3\text{-NH}_2\text{CH}_2\text{CH}_2\text{OH}$ molecule on water droplet                                                                                                                                                                                                                                                                                     |
| S25    | <b>Fig. S11</b> BOMD simulation trajectories and snapshots of $\text{NH}_2\text{CH}_2\text{CH}_2\text{SO}_4 \cdots \text{H}_3\text{O}^+$ ion pair from the reaction between $\text{SO}_3$ and $\text{HOCH}_2\text{CH}_2\text{NH}_2$ with one interfacial water molecule on water droplet                                                                                                                                              |
| S26    | <b>Fig. S12</b> BOMD simulation trajectories and snapshots of $\text{NH}_2\text{CH}_2\text{CH}_2\text{SO}_4 \cdots \text{H}_3\text{O}^+$ ion pair from the reaction between $\text{SO}_3$ and $\text{HOCH}_2\text{CH}_2\text{NH}_2$ with two interfacial water molecules on water droplet                                                                                                                                             |
| S27    | <b>Fig. S13</b> BOMD simulation trajectories and snapshots of $\text{HSO}_4^-$ and $\text{HOCH}_2\text{CH}_2\text{NH}_3^+$ ion from $\text{SO}_3$ , $\text{HOCH}_2\text{CH}_2\text{NH}_2$ and three interfacial water molecules on water droplet                                                                                                                                                                                      |
| S28    | <b>Fig. S14</b> BOMD simulation trajectories and snapshots of $\text{HOCH}_2\text{CH}_2\text{NH}_2^+\text{-SO}_3^-$ ion pair from the reaction between $\text{SO}_3$ and $\text{HOCH}_2\text{CH}_2\text{NH}_2$ on water droplet                                                                                                                                                                                                       |
| S29    | <b>Fig. S15</b> BOMD simulation trajectories and snapshots of $\text{SO}_3^-\text{-OCH}_2\text{CH}_2\text{NH}_3^+$ ion pair from the $\text{SO}_3\text{-HOCH}_2\text{CH}_2\text{NH}_2$ complex on water droplet                                                                                                                                                                                                                       |
| S30    | <b>Fig. S16</b> Snapshots of the nucleation simulation from the product of reaction of $\text{SO}_3$ with $\text{NH}_2$ moiety of $\text{HOCH}_2\text{CH}_2\text{NH}_2$                                                                                                                                                                                                                                                               |

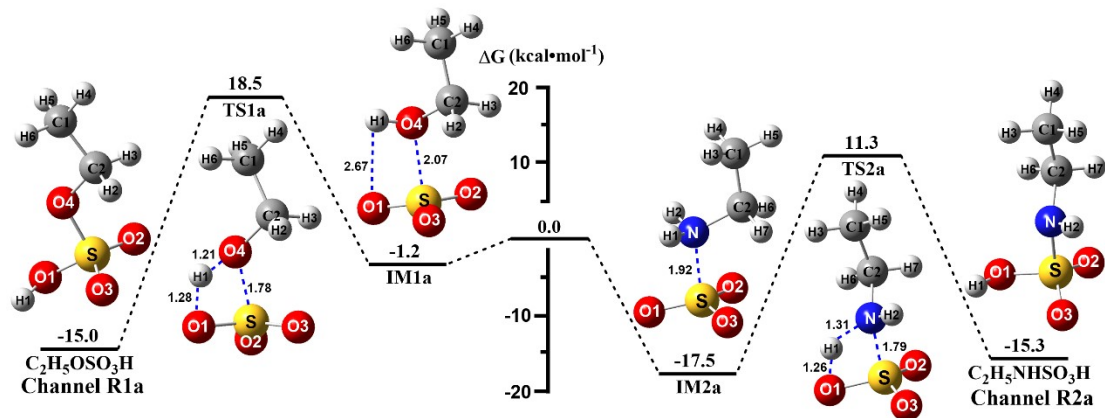

**Fig. S1** Schematic potential energy surfaces for the reactions of  $\text{SO}_3 + \text{C}_2\text{H}_5\text{OH}$  and  $\text{SO}_3 + \text{C}_2\text{H}_5\text{NH}_2$  at the CCSD(T)-F12/cc-pVTZ-F12//M06-2X/6-311++G(2df,2pd) level

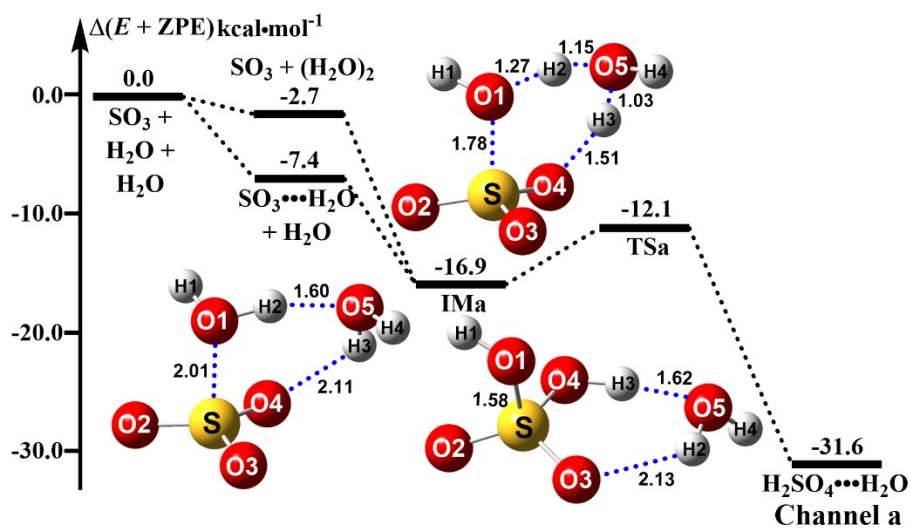

**Fig. S2** Schematic potential energy surface for the reaction of  $\text{SO}_3 + 2\text{H}_2\text{O}$  at the CCSD(T)-F12/cc-pVTZ-F12//M06-2X/6-311++G(2df,2pd) level

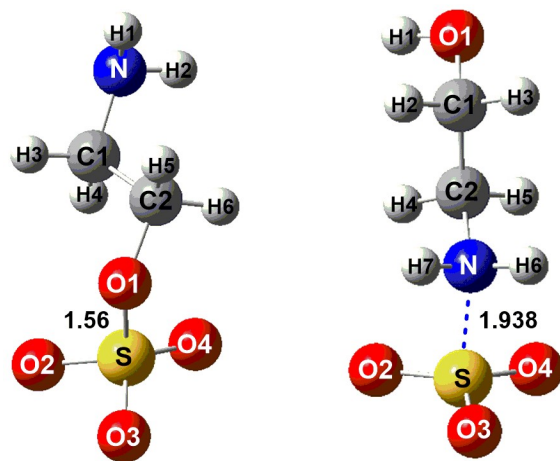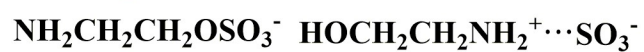

**Fig. S3** The optimized geometrical structures for  $\text{NH}_2\text{CH}_2\text{CH}_2\text{OSO}_3^-$  and  $\text{HOCH}_2\text{CH}_2\text{NH}_2^+ \cdots \text{SO}_3^-$  ion at the M06-2X/6-311++G(2df,2pd) level

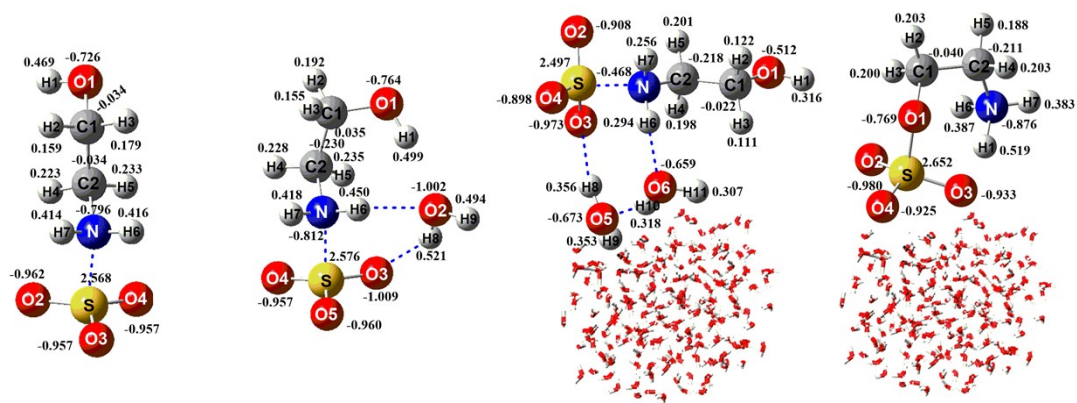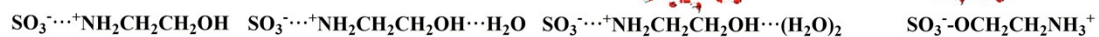

**Fig. S4** NBO charges of  $\text{SO}_3^- \cdots ^+\text{NH}_2\text{CH}_2\text{CH}_2\text{OH}$  and  $\text{SO}_3^- \cdots ^+\text{NH}_2\text{CH}_2\text{CH}_2\text{OH} \cdots \text{H}_2\text{O}$  in the gas phase optimized at the M06-2X/6-311++G(2df,2pd) level and the NBO charges of ring complexes of  $\text{SO}_3^- \cdots ^+\text{NH}_2\text{CH}_2\text{CH}_2\text{OH} \cdots (\text{H}_2\text{O})_2$  and  $\text{SO}_3^- \text{-OCH}_2\text{CH}_2\text{NH}_3^+$  on the droplet optimized with ONIOM method (M06-2X/6-311++G(2df,2pd):pm6)

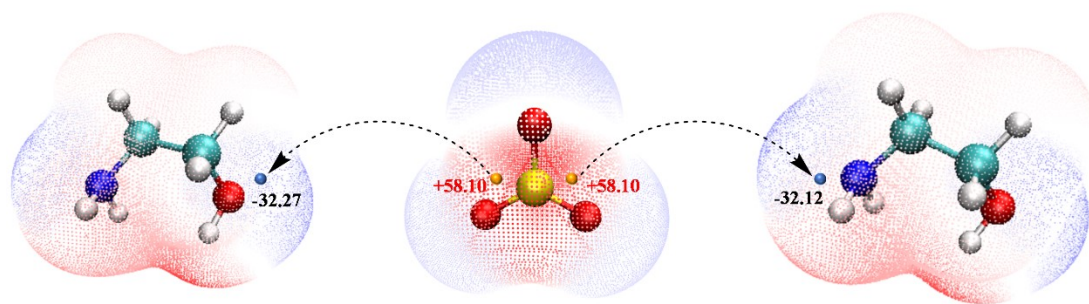

**Fig. S5** Computed electrostatic potential mapped molecular van der Waals (vdW) surfaces of  $\text{SO}_3$  with OH and  $\text{NH}_2$  moieties  $\text{HOCH}_2\text{CH}_2\text{NH}_2$  molecules at the M06-2X/6-311++G(2df,2pd) level

**Table S1** The Energy barriers ( $\Delta E$ ) and unsigned error (UE) ( $\text{kcal}\cdot\text{mol}^{-1}$ ) for the  $\text{SO}_3 + \text{HOCH}_2\text{CH}_2\text{NH}_2$  reaction at different theoretical methods with zero-point energy (ZPE) correction

| Channel <sup>a</sup> | Methods                                               | $\Delta E^b$ | $\Delta E^c$ | $\Delta E^d$ | UE   |
|----------------------|-------------------------------------------------------|--------------|--------------|--------------|------|
| Channel R1           | CCSD(T)/CBS//M06-2X/<br>6-311++G(2df,2pd)             | -27.0        | 1.9          | -24.8        | 0.00 |
|                      | CCSD(T)-F12/cc-pVTZ-F12//M06-2X/<br>6-311++G(2df,2pd) | -27.2        | 2.2          | -24.5        | 0.27 |
|                      | CCSD(T)/aug-cc-pVTZ//M06-2X/<br>6-311++G(2df,2pd)     | -25.7        | 2.4          | -23.8        | 0.93 |
|                      | CCSD(T)-F12/cc-pVDZ-F12//M06-2X/<br>6-311++G(2df,2pd) | -25.8        | 3.5          | -23.2        | 1.47 |
| Channel R2           | CCSD(T)/CBS//M06-2X/<br>6-311++G(2df,2pd)             | -15.8        | 6.0          | -33.1        | 0.00 |
|                      | CCSD(T)-F12/cc-pVTZ-F12//M06-2X/<br>6-311++G(2df,2pd) | -15.6        | 6.3          | -32.9        | 0.23 |
|                      | CCSD(T)/aug-cc-pVTZ//M06-2X/<br>6-311++G(2df,2pd)     | -15.3        | 6.6          | -31.6        | 0.87 |
|                      | CCSD(T)-F12/cc-pVDZ-F12//M06-2X/<br>6-311++G(2df,2pd) | -14.9        | 7.4          | -31.5        | 1.23 |

<sup>a</sup> Channel R1 and Channel R2 denote the gas-phase reactions of  $\text{SO}_3$  with OH and  $\text{NH}_2$  moieties of MEA, respectively;

<sup>b, c and d</sup> respectively denote the species of pre-reactive complexes, transition states and products involved in the  $\text{SO}_3 + \text{MEA}$  reaction.

As presented in Table S1, the unsigned error at the CCSD(T)-F12/cc-pVDZ-F12//M06-2X/6-311++G(2df,2pd) level compared to unsigned error calculated at the CCSD(T)/CBS//M06-2X/6-311++G(2df,2pd) level, was more than  $1.47 \text{ kcal}\cdot\text{mol}^{-1}$ , indicating that CCSD(T)-F12 with a small basis set of cc-pVDZ-F12 is not appropriate. As compared with unsigned error calculated at the CCSD(T)/CBS//M06-2X/6-311++G(2df,2pd) level, unsigned errors calculated at CCSD(T)/aug-cc-pVTZ//M06-2X/6-311++G(2df,2pd) and CCSD(T)-F12/cc-pVTZ-F12//M06-2X/6-311++G(2df,2pd) were 0.93 and 0.27  $\text{kcal}\cdot\text{mol}^{-1}$ , respectively, suggesting that the relative energies obtained at the CCSD(T)-F12/cc-pVTZ-F12//M06-2X/6-311++G(2df,2pd) level is the most favorable among three levels of CCSD(T)-F12/cc-pVDZ-F12//M06-2X/6-311++G(2df,2pd), CCSD(T)/aug-cc-pVTZ//M06-2X/6-311++G(2df,2pd) and CCSD(T)-F12/cc-pVTZ-F12//M06-2X/6-311++G(2df,2pd). Considering the computational accuracy, the CCSD(T)-F12/cc-pVTZ-F12//M06-2X/6-311++G(2df,2pd) method was chosen to calculate the single point energies of all species for the  $\text{SO}_3 + \text{MEA}$  reactions without and with water. So, the single-point energy



calculations for the  $\text{SO}_3 + \text{MEA}$  reaction without and with water molecule in the gas phase have been performed at the CCSD(T)-F12/cc-pVTZ-F12 level based on the optimized geometries at the M06-2X/6-311++G(2*df*,2*pd*) level.

**Table S2** Relative energies ( $\Delta E$  and  $\Delta(E + \text{ZPE})/(\text{kcal}\cdot\text{mol}^{-1})$ ), enthalpies ( $\Delta H/(\text{kcal}\cdot\text{mol}^{-1})$ ), entropy ( $S(298\text{ K})/(\text{cal}\cdot\text{mol}^{-1}\cdot\text{K}^{-1})$ ) and Gibbs free energies ( $\Delta G(298\text{ K})/(\text{kcal}\cdot\text{mol}^{-1})$ ) for the reaction of  $\text{SO}_3$  with  $\text{C}_2\text{H}_5\text{OH}$  and  $\text{C}_2\text{H}_5\text{NH}_2$ , along with the reactions between  $\text{SO}_3$  and the OH and  $\text{NH}_2$  moieties of  $\text{HOCH}_2\text{CH}_2\text{NH}_2$  without and with  $\text{H}_2\text{O}$

| Species                                                                              | ZPE  | $\Delta E$ | S     | $\Delta G$ | $\Delta(E + \text{ZPE})$ | $\Delta H$ | $T_1$      |
|--------------------------------------------------------------------------------------|------|------------|-------|------------|--------------------------|------------|------------|
| $\text{SO}_3 + \text{HOCH}_2\text{CH}_2\text{NH}_2$                                  | 70.4 | 0.0        | 134.3 | 0.0        | 0.0                      | 0.0        | 0.02820363 |
| IM1                                                                                  | 72.5 | -17.7      | 94.5  | -4.1       | -15.6                    | -15.9      | 0.0144697  |
| TS1                                                                                  | 69.4 | 7.3        | 90.8  | 18.6       | 6.3                      | 5.6        | 0.01471739 |
| $\text{NH}_2\text{CH}_2\text{CH}_2\text{SO}_4\text{H}$                               | 73.2 | -35.6      | 86.4  | -19.6      | -32.9                    | -33.9      | 0.01397518 |
| $\text{SO}_3 + \text{NH}_2\text{CH}_2\text{CH}_2\text{OH}$                           | 70.4 | 0.0        | 134.3 | 0.0        | 0.0                      | 0.0        | 0.02820363 |
| IM2                                                                                  | 73.7 | -30.5      | 89.8  | -14.6      | -27.2                    | -27.9      | 0.01440033 |
| TS2                                                                                  | 70.0 | 2.6        | 91.6  | 14.2       | 2.2                      | 1.5        | 0.01465095 |
| $\text{HOCH}_2\text{CH}_2\text{NHSO}_3\text{H}$                                      | 72.5 | -26.6      | 91.2  | -12.2      | -24.5                    | -25.0      | 0.01406416 |
| $\text{SO}_3 + \text{HOCH}_2\text{CH}_2\text{NH}_2 + \text{H}_2\text{O}$             | 84.0 | 0.0        | 179.4 | 0.0        | 0.0                      | 0.0        | 0.03820721 |
| $\text{SO}_3 \cdots \text{H}_2\text{O} + \text{HOCH}_2\text{CH}_2\text{NH}_2$        | 86.4 | -9.8       | 147.5 | 1.5        | -7.4                     | -8.0       | 0.02654947 |
| $\text{SO}_3 + \text{HOCH}_2\text{CH}_2\text{NH}_2 \cdots \text{H}_2\text{O}$        | 86.3 | -6.0       | 149.5 | 4.7        | -3.7                     | -4.2       | 0.0284588  |
| IM_WM1                                                                               | 88.2 | -27.5      | 106.5 | -2.5       | -23.3                    | -24.2      | 0.01394004 |
| TS_WM1                                                                               | 86.4 | -21.5      | 99.3  | 2.8        | -19.1                    | -21.0      | 0.01392185 |
| $\text{NH}_2\text{CH}_2\text{CH}_2\text{SO}_4\text{H} \cdots \text{H}_2\text{O}$     | 89.1 | -44.7      | 99.9  | -17.6      | -39.6                    | -41.3      | 0.01359628 |
| $\text{SO}_3 + \text{NH}_2\text{CH}_2\text{CH}_2\text{OH} + \text{H}_2\text{O}$      | 84.0 | 0.0        | 179.4 | 0.0        | 0.0                      | 0.0        | 0.03820721 |
| $\text{SO}_3 \cdots \text{H}_2\text{O} + \text{NH}_2\text{CH}_2\text{CH}_2\text{OH}$ | 86.4 | -9.8       | 147.5 | 1.5        | -7.4                     | -8.0       | 0.02654947 |
| $\text{SO}_3 + \text{HOCH}_2\text{CH}_2\text{NH}_2 \cdots \text{H}_2\text{O}$        | 86.3 | -6.0       | 149.5 | 4.7        | -3.7                     | -4.2       | 0.0284588  |
| IM_WM2                                                                               | 89.4 | -43.2      | 105.0 | -16.8      | -37.8                    | -39.0      | 0.01396046 |
| TS_WM2                                                                               | 86.4 | -25.8      | 96.3  | -1.0       | -23.4                    | -25.7      | 0.01401585 |
| $\text{HOCH}_2\text{CH}_2\text{NHSO}_3\text{H} \cdots \text{H}_2\text{O}$            | 88.4 | -38.9      | 104.7 | -13.5      | -34.6                    | -35.8      | 0.01366066 |
| $\text{SO}_3 + \text{C}_2\text{H}_5\text{OH}$                                        | 58.6 | 0.0        | 129.1 | 0.0        | 0.0                      | 0.0        | 0.02786553 |
| IM1a                                                                                 | 60.9 | -15.0      | 89.8  | -1.2       | -12.6                    | -12.9      | 0.01485214 |
| TS1a                                                                                 | 58.0 | 7.2        | 86.9  | 18.5       | 6.7                      | 5.9        | 0.01506695 |
| $\text{C}_2\text{H}_5\text{SO}_4\text{H}$                                            | 61.0 | -29.3      | 87.6  | -15.0      | -26.8                    | -27.4      | 0.01418237 |
| $\text{SO}_3 + \text{C}_2\text{H}_5\text{NH}_2$                                      | 66.7 | 0.0        | 129.5 | 0.0        | 0.0                      | 0.0        | 0.02786553 |
| IM2a                                                                                 | 69.8 | -32.2      | 88.8  | -17.5      | -29.1                    | -29.6      | 0.01438851 |
| TS2a                                                                                 | 66.6 | -0.9       | 85.4  | 11.3       | -1.0                     | -1.9       | 0.01474855 |
| $\text{C}_2\text{H}_5\text{NHSO}_3\text{H}$                                          | 68.8 | -29.4      | 87.5  | -15.3      | -27.3                    | -27.9      | 0.01400273 |

The schematic potential energy surfaces for the  $\text{SO}_3 + \text{HOCH}_2\text{CH}_2\text{NH}_2$  reaction (in  $\text{kcal}\cdot\text{mol}^{-1}$ ) without (Fig. 1) and with (Fig. 2) water have been re-calculated at the CCSD(T)-F12/cc-pVTZ-F12//M06-2X/6-311++G(2df,2pd) level, whereas relative energies ( $\Delta E$  and  $\Delta(E + \text{ZPE})/(\text{kcal}\cdot\text{mol}^{-1})$ ), enthalpies ( $\Delta H/(\text{kcal}\cdot\text{mol}^{-1})$ ), entropy ( $S(298\text{ K})/(\text{cal}\cdot\text{mol}^{-1}\cdot\text{K}^{-1})$ ) and Gibbs free energies ( $\Delta G(298\text{ K})/(\text{kcal}\cdot\text{mol}^{-1})$ ) for the reaction of  $\text{SO}_3$  with  $\text{C}_2\text{H}_5\text{OH}$  and  $\text{C}_2\text{H}_5\text{NH}_2$ , along with the

reactions between  $\text{SO}_3$  and the OH and  $\text{NH}_2$  moieties of  $\text{HOCH}_2\text{CH}_2\text{NH}_2$  without and with  $\text{H}_2\text{O}$  has been reorganized in Table S2.

**Table S3** Equilibrium coefficients ( $\text{cm}^3 \cdot \text{molecule}^{-1}$ ) for the  $\text{SO}_3 \cdots \text{H}_2\text{O}$  and  $\text{HOCH}_2\text{CH}_2\text{NH}_2 \cdots \text{H}_2\text{O}$  complexes within 212.6-320.0 K <sup>a</sup>

| $T/\text{K}$ | $\text{SO}_3 \cdots \text{H}_2\text{O}$ | $\text{HOCH}_2\text{CH}_2\text{NH}_2 \cdots \text{H}_2\text{O}$ |
|--------------|-----------------------------------------|-----------------------------------------------------------------|
| 212.6        | $2.25 \times 10^{-20}$                  | $1.99 \times 10^{-23}$                                          |
| 229.7        | $1.41 \times 10^{-20}$                  | $1.58 \times 10^{-23}$                                          |
| 259.3        | $9.99 \times 10^{-21}$                  | $1.33 \times 10^{-23}$                                          |
| 280.0        | $9.18 \times 10^{-21}$                  | $1.28 \times 10^{-23}$                                          |
| 290.0        | $6.14 \times 10^{-21}$                  | $1.05 \times 10^{-23}$                                          |
| 298.0        | $4.22 \times 10^{-21}$                  | $8.75 \times 10^{-24}$                                          |
| 300.0        | $6.78 \times 10^{-20}$                  | $3.45 \times 10^{-23}$                                          |
| 310.0        | $4.41 \times 10^{-19}$                  | $8.84 \times 10^{-23}$                                          |
| 320.0        | $1.69 \times 10^{-18}$                  | $1.75 \times 10^{-22}$                                          |

<sup>a</sup> All equilibrium coefficients were calculated by using energies computed at the CCSD(T)-F12/cc-pVTZ-F12//M06-2X/6-311++G(2df,2pd) level and partition functions obtained at the M06-2X/6-311++G(2df,2pd) level.

**Table S4** Concentrations (molecules·cm<sup>-3</sup>) for the SO<sub>3</sub>···H<sub>2</sub>O and HOCH<sub>2</sub>CH<sub>2</sub>NH<sub>2</sub>···H<sub>2</sub>O complexes within 212.6-320.0 K <sup>a</sup>

| T/K   | SO <sub>3</sub> ···H <sub>2</sub> O | HOCH <sub>2</sub> CH <sub>2</sub> NH <sub>2</sub> ···H <sub>2</sub> O |
|-------|-------------------------------------|-----------------------------------------------------------------------|
| 280.0 | 5.81                                | 1.29 × 10 <sup>4</sup>                                                |
| 290.0 | 6.76                                | 1.89 × 10 <sup>4</sup>                                                |
| 298.0 | 7.72                                | 2.58 × 10 <sup>4</sup>                                                |
| 300.0 | 7.88                                | 2.75 × 10 <sup>4</sup>                                                |
| 310.0 | 8.96                                | 3.84 × 10 <sup>4</sup>                                                |
| 320.0 | 9.91                                | 5.14 × 10 <sup>4</sup>                                                |

<sup>a</sup> All concentrations were calculated by using energies computed at CCSD(T)-F12/cc-pVTZ-F12//M06-2X/6-311++G(2df,2pd) level and partition functions obtained at the M06-2X/6-311++G(2df,2pd) level.

**Table S5** Rate coefficients ( $\text{cm}^3\cdot\text{molecule}^{-1}\cdot\text{s}^{-1}$ ) for the  $\text{SO}_3 + \text{HOCH}_2\text{CH}_2\text{NH}_2$  reaction without and with  $\text{H}_2\text{O}$  with HIR treatment calculated by master equation within 212.6-320.0 K <sup>a</sup>

| Channel     | Altitude (km) | T/K   | with HIR treatments    | without HIR treatments |
|-------------|---------------|-------|------------------------|------------------------|
| Channel R1  | 0 km          | 280.0 | $1.58 \times 10^{-18}$ | $1.58 \times 10^{-18}$ |
|             |               | 290.0 | $1.63 \times 10^{-18}$ | $1.63 \times 10^{-18}$ |
|             |               | 298.0 | $1.67 \times 10^{-18}$ | $1.68 \times 10^{-18}$ |
|             |               | 300.0 | $1.69 \times 10^{-18}$ | $1.69 \times 10^{-18}$ |
|             |               | 310.0 | $1.75 \times 10^{-18}$ | $1.76 \times 10^{-18}$ |
|             |               | 320.0 | $1.83 \times 10^{-18}$ | $1.84 \times 10^{-18}$ |
|             | 5 km          | 212.6 | $1.68 \times 10^{-18}$ | $1.68 \times 10^{-18}$ |
|             | 10 km         | 229.7 | $1.93 \times 10^{-18}$ | $1.93 \times 10^{-18}$ |
|             | 15 km         | 259.3 | $2.40 \times 10^{-18}$ | $2.40 \times 10^{-18}$ |
|             | Channel R2    | 0 km  | 280.0                  | $1.51 \times 10^{-16}$ |
| 290.0       |               |       | $1.77 \times 10^{-16}$ | $1.74 \times 10^{-16}$ |
| 298.0       |               |       | $1.99 \times 10^{-16}$ | $1.96 \times 10^{-16}$ |
| 300.0       |               |       | $2.04 \times 10^{-16}$ | $2.01 \times 10^{-16}$ |
| 310.0       |               |       | $2.33 \times 10^{-16}$ | $2.30 \times 10^{-16}$ |
| 320.0       |               |       | $2.62 \times 10^{-16}$ | $2.60 \times 10^{-16}$ |
| 5 km        |               | 212.6 | $1.50 \times 10^{-16}$ | $1.47 \times 10^{-16}$ |
| 10 km       |               | 229.7 | $1.35 \times 10^{-16}$ | $1.31 \times 10^{-16}$ |
| 15 km       |               | 259.3 | $1.65 \times 10^{-16}$ | $1.59 \times 10^{-16}$ |
| Channel WM1 |               | 0 km  | 280.0                  | $7.42 \times 10^{-11}$ |
|             | 290.0         |       | $7.53 \times 10^{-11}$ | $4.45 \times 10^{-11}$ |
|             | 298.0         |       | $7.60 \times 10^{-11}$ | $4.43 \times 10^{-11}$ |
|             | 300.0         |       | $7.62 \times 10^{-11}$ | $4.43 \times 10^{-11}$ |
|             | 310.0         |       | $7.72 \times 10^{-11}$ | $4.40 \times 10^{-11}$ |
|             | 320.0         |       | $7.78 \times 10^{-11}$ | $4.34 \times 10^{-11}$ |
|             | 5 km          | 212.6 | $7.16 \times 10^{-11}$ | $4.41 \times 10^{-11}$ |
|             | 10 km         | 229.7 | $6.68 \times 10^{-11}$ | $4.21 \times 10^{-11}$ |
|             | 15 km         | 259.3 | $6.36 \times 10^{-11}$ | $4.02 \times 10^{-11}$ |
|             | Channel WM2   | 0 km  | 280.0                  | $5.85 \times 10^{-12}$ |
| 290.0       |               |       | $6.30 \times 10^{-12}$ | $3.50 \times 10^{-12}$ |
| 298.0       |               |       | $6.65 \times 10^{-12}$ | $3.64 \times 10^{-12}$ |
| 300.0       |               |       | $6.74 \times 10^{-12}$ | $3.67 \times 10^{-12}$ |
| 310.0       |               |       | $7.17 \times 10^{-12}$ | $3.93 \times 10^{-12}$ |
| 320.0       |               |       | $7.58 \times 10^{-12}$ | $4.51 \times 10^{-12}$ |
| 5 km        |               | 212.6 | $6.45 \times 10^{-12}$ | $3.98 \times 10^{-12}$ |
| 10 km       |               | 229.7 | $6.43 \times 10^{-12}$ | $4.31 \times 10^{-12}$ |
| 15 km       |               | 259.3 | $6.32 \times 10^{-12}$ | $4.91 \times 10^{-12}$ |

<sup>a</sup>  $k_{R1}$  and  $k_{R2}$  were respectively denoted the rate coefficients for the reactions of  $\text{SO}_3$  with OH and  $\text{NH}_2$  moieties in  $\text{HOCH}_2\text{CH}_2\text{NH}_2$ ;  $k_{WM1}$  and  $k_{WM2}$  were respectively denoted the rate coefficients for the reactions of  $\text{SO}_3$  with OH and  $\text{NH}_2$  moieties in  $\text{HOCH}_2\text{CH}_2\text{NH}_2$  in the presence of  $\text{H}_2\text{O}$ .

As for the  $\text{SO}_3 + \text{MEA}$  reaction with water, the effect of HIR plays a minor role in the gas-phase reactions of  $\text{SO}_3$  with OH (Channel WM1) and  $\text{NH}_2$  (Channel WM2) moieties of MEA. As compared with the effect of HIR in Channels R1 and R2 without water, the effect of HIR in Channels WM1 and WM2 is further reduced. This can be explained as follows. On the one hand,

the pre-reactive complexes, products and transition states involved in the  $\text{SO}_3 + \text{MEA}$  reaction with water were shown the quasi-planar ring structures and cage-like ring structures. As compared with the naked reaction (Fig. 1), these ring structures reduce the ring tension obviously and increase the stability of the pre-reactive complexes, products and transition states greatly. On the other hand, the numbers of hydrogen bonds in  $\text{H}_2\text{O}$ -assisted pre-reactive complexes, products and transition states were increased, which hinder the rotation bonds of S-O1, H1-O5 and H8-O3 (Channel WM1) and S-N, H7-O5 and H8-O2 (Channel WM1) in  $\text{H}_2\text{O}$ -assisted pre-reactive complexes, products and transition states (Fig. 2).

**Table S6** Rate coefficients ( $\text{cm}^3 \cdot \text{molecule}^{-1} \cdot \text{s}^{-1}$ ) for the  $\text{SO}_3 + \text{HOCH}_2\text{CH}_2\text{NH}_2$  reaction without and with  $\text{H}_2\text{O}$  calculated within 212.6-320.0 K <sup>a</sup>

| Channels    | Altitude (km) | 0 km                   |                        |                        |                        |                        |                        | 5 km                   | 10 km                  | 15 km                  |
|-------------|---------------|------------------------|------------------------|------------------------|------------------------|------------------------|------------------------|------------------------|------------------------|------------------------|
|             | <i>T</i> (K)  | 280.0 K                | 290.0 K                | 298.0 K                | 300.0 K                | 310.0 K                | 320.0 K                | 259.3 K                | 229.7 K                | 212.6 K                |
| Channel R1  | $k_{bR1}$     | $1.73 \times 10^{-18}$ | $1.30 \times 10^{-18}$ | $1.09 \times 10^{-18}$ | $1.04 \times 10^{-18}$ | $8.94 \times 10^{-19}$ | $8.07 \times 10^{-19}$ | $4.18 \times 10^{-18}$ | $3.09 \times 10^{-17}$ | $1.72 \times 10^{-16}$ |
| Channel R2  | $k_{bR2}$     | $6.53 \times 10^{-15}$ | $3.52 \times 10^{-15}$ | $2.32 \times 10^{-15}$ | $2.10 \times 10^{-15}$ | $1.37 \times 10^{-15}$ | $9.63 \times 10^{-16}$ | $3.53 \times 10^{-14}$ | $1.10 \times 10^{-12}$ | $1.83 \times 10^{-11}$ |
| Channel WM1 | $k_{bWM1}$    | $6.49 \times 10^{-5}$  | $2.37 \times 10^{-5}$  | $1.12 \times 10^{-5}$  | $9.31 \times 10^{-6}$  | $3.89 \times 10^{-6}$  | $1.71 \times 10^{-6}$  | $6.95 \times 10^{-4}$  | $3.83 \times 10^{-2}$  | 0.68                   |
| Channel WM2 | $k_{bWM2}$    | $9.08 \times 10^{-2}$  | $2.41 \times 10^{-2}$  | $8.94 \times 10^{-3}$  | $7.03 \times 10^{-3}$  | $2.22 \times 10^{-3}$  | $7.58 \times 10^{-4}$  | 2.08                   | $4.23 \times 10^{-2}$  | $1.98 \times 10^{-4}$  |

<sup>a</sup>  $k_{bR1}$  and  $k_{bR2}$  were respectively denoted the rate coefficients for the reactions of  $\text{SO}_3$  with OH and  $\text{NH}_2$  moieties in  $\text{HOCH}_2\text{CH}_2\text{NH}_2$  by the steady-state approximation;  $k_{bWM1}$  and  $k_{bWM2}$  were respectively denoted the rate coefficients for the reactions of  $\text{SO}_3$  with OH and  $\text{NH}_2$  moieties in  $\text{HOCH}_2\text{CH}_2\text{NH}_2$  in the presence of  $\text{H}_2\text{O}$  by the steady-state approximation.



## Part S1 Calculations of rate coefficients in the gas phase

The ILT methods [1,2] and RRKM theory [3,4] can be respectively expressed in equations (S1) and (S2), respectively.

$$k(T) = \frac{1}{Q(\beta)} \int_0^{\infty} k(E) \rho(E) \exp(-\beta E) dE \quad (\text{S1})$$

$$k(E) = \frac{W(E - E_0)}{h \rho(E)} \quad (\text{S2})$$

Where  $W(E-E_0)$  is the rovibrational sum of states at the optimized transition state (TS) geometry (excluding the degree of freedom associated with passage through the TS),  $E_0$  is the reaction threshold energy,  $h$  is Planck's constant,  $\rho(E)$  is the active (ro-vibrational) density of state of the reactant at energy level  $E$  and  $Q(\beta)$  is the corresponding canonical partition function. Meanwhile, Meanwhile, the tunneling effect was treated in RRKM calculation by employing a one-dimensional asymmetrical Eckart potential. The collisional energy-transfer process was computed

with the temperature-dependent exponential-down model with  $\langle \Delta E_{\text{down}} \rangle = 75 \times \left( \frac{T}{300} \right)^{1.05} \text{ cm}^{-1}$ , with  $\text{N}_2$  as the bath gas [5,6]. The Lennard-Jones (L-J) parameters of epsilon  $\varepsilon/k_B = 218.1 \text{ K}$  and sigma  $\sigma = 3.13 \text{ \AA}$  were used for  $\text{SO}_3$ , while the parameters of epsilon  $\varepsilon/k_B = 470.6 \text{ K}$  and sigma  $\sigma = 4.41 \text{ \AA}$  were estimated for MEA.

## References

- [1] Kumar, A., Mallick, S., Kumar, P., Oxidation of HOSO by Cl: a new source of  $\text{SO}_2$  in the atmosphere? *Phys. Chem. Chem. Phys.*, **2021**, 23, 18707-18711.
- [2] Horváth, G., Horváth, I., Almousa, S. A. D., Telek, M., Numerical inverse laplace transformation using concentrated matrix exponential distributions. *Perform. Evaluation*, **2020**, 137, 102067.
- [3] Mai, T. V. T., Duong, M. V., Nguyen, H. T., Huynh, L. K., Ab initio kinetics of the  $\text{HOSO}_2 + {}^3\text{O}_2 \rightarrow \text{SO}_3 + \text{HO}_2$  reaction. *Phys. Chem. Chem. Phys.* **2018**, 20, 6677-6687.
- [4] Mallick, S., Kumar, A., Kumar, P., Oxidation of HOSO by  $\text{NH}_2$ : A new path for the formation of an acid rain precursor. *Chem. Phys. Lett.* **2021**, 773, 138536.
- [5] Mai, T. V. T.; Nguyen, H. T.; Huynh, L. K. J. P. C. C. P., Ab initio dynamics of hydrogen abstraction from  $\text{N}_2\text{H}_4$  by OH radicals: an RRKM-based master equation study. *Phys. Chem. Chem. Phys.* **2019**, 21, (42), 23733-23741.
- [6] Mai, T. V. T.; Nguyen, H. T.; Huynh, L. K. J. A. E., Kinetics of hydrogen abstraction from  $\text{CH}_3\text{SH}$  by OH radicals: An ab initio RRKM-based master equation study. *Atmos. Environ.* **2020**, 242, 117833.

**Table S7** The high-pressure limiting rate coefficients ( $\text{cm}^3 \cdot \text{molecule}^{-1} \cdot \text{s}^{-1}$ ) for the reaction of  $\text{SO}_3$  with  $\text{C}_2\text{H}_5\text{OH}$  and  $\text{C}_2\text{H}_5\text{NH}_2$ , along with the reactions between  $\text{SO}_3$  and the OH and  $\text{NH}_2$  moieties of  $\text{HOCH}_2\text{CH}_2\text{NH}_2$  without and with  $\text{H}_2\text{O}$  within 212.6-320.0 K

| $T$ (K) | $\text{SO}_3 + \text{HOCH}_2\text{CH}_2\text{NH}_2$<br>$\rightarrow \text{SO}_3 \cdots \text{HOCH}_2\text{CH}_2\text{NH}_2$                                                       | $\text{SO}_3 + \text{HOCH}_2\text{CH}_2\text{NH}_2$<br>$\rightarrow \text{SO}_3 \cdots \text{NH}_2\text{CH}_2\text{CH}_2\text{OH}$ | $\text{SO}_3 + \text{HOCH}_2\text{CH}_2\text{NH}_2 + \text{H}_2\text{O}$<br>$\rightarrow \text{SO}_3 \cdots \text{HOCH}_2\text{CH}_2\text{NH}_2 \cdots \text{H}_2\text{O}$ |
|---------|-----------------------------------------------------------------------------------------------------------------------------------------------------------------------------------|------------------------------------------------------------------------------------------------------------------------------------|----------------------------------------------------------------------------------------------------------------------------------------------------------------------------|
| 212.6   | $6.74 \times 10^{-11}$                                                                                                                                                            | $6.20 \times 10^{-11}$                                                                                                             | $4.52 \times 10^{-11}$                                                                                                                                                     |
| 229.7   | $7.01 \times 10^{-11}$                                                                                                                                                            | $6.45 \times 10^{-11}$                                                                                                             | $4.69 \times 10^{-11}$                                                                                                                                                     |
| 259.3   | $7.44 \times 10^{-11}$                                                                                                                                                            | $6.84 \times 10^{-11}$                                                                                                             | $4.98 \times 10^{-11}$                                                                                                                                                     |
| 280.0   | $7.73 \times 10^{-11}$                                                                                                                                                            | $7.11 \times 10^{-11}$                                                                                                             | $5.18 \times 10^{-11}$                                                                                                                                                     |
| 290.0   | $7.87 \times 10^{-11}$                                                                                                                                                            | $7.24 \times 10^{-11}$                                                                                                             | $5.27 \times 10^{-11}$                                                                                                                                                     |
| 298.0   | $7.98 \times 10^{-11}$                                                                                                                                                            | $7.34 \times 10^{-11}$                                                                                                             | $5.34 \times 10^{-11}$                                                                                                                                                     |
| 300.0   | $8.00 \times 10^{-11}$                                                                                                                                                            | $7.36 \times 10^{-11}$                                                                                                             | $5.36 \times 10^{-11}$                                                                                                                                                     |
| 310.0   | $8.13 \times 10^{-11}$                                                                                                                                                            | $7.48 \times 10^{-11}$                                                                                                             | $5.45 \times 10^{-11}$                                                                                                                                                     |
| 320.0   | $8.23 \times 10^{-11}$                                                                                                                                                            | $7.60 \times 10^{-11}$                                                                                                             | $5.54 \times 10^{-11}$                                                                                                                                                     |
| $T$ (K) | $\text{SO}_3 + \text{HOCH}_2\text{CH}_2\text{NH}_2 + \text{H}_2\text{O}$<br>$\rightarrow \text{SO}_3 \cdots \text{NH}_2\text{CH}_2\text{CH}_2\text{OH} \cdots \text{H}_2\text{O}$ | $\text{SO}_3 + \text{C}_2\text{H}_5\text{OH}$<br>$\rightarrow \text{SO}_3 \cdots \text{C}_2\text{H}_5\text{OH}$                    | $\text{SO}_3 + \text{C}_2\text{H}_5\text{NH}_2$<br>$\rightarrow \text{SO}_3 \cdots \text{C}_2\text{H}_5\text{NH}_2$                                                        |
| 212.6   | $5.95 \times 10^{-11}$                                                                                                                                                            | $8.06 \times 10^{-11}$                                                                                                             | $5.24 \times 10^{-11}$                                                                                                                                                     |
| 229.7   | $6.18 \times 10^{-11}$                                                                                                                                                            | $8.37 \times 10^{-11}$                                                                                                             | $5.45 \times 10^{-11}$                                                                                                                                                     |
| 259.3   | $6.56 \times 10^{-11}$                                                                                                                                                            | $8.89 \times 10^{-11}$                                                                                                             | $5.78 \times 10^{-11}$                                                                                                                                                     |
| 280.0   | $6.82 \times 10^{-11}$                                                                                                                                                            | $9.24 \times 10^{-11}$                                                                                                             | $6.01 \times 10^{-11}$                                                                                                                                                     |
| 290.0   | $6.94 \times 10^{-11}$                                                                                                                                                            | $9.40 \times 10^{-11}$                                                                                                             | $6.12 \times 10^{-11}$                                                                                                                                                     |
| 298.0   | $7.04 \times 10^{-11}$                                                                                                                                                            | $9.53 \times 10^{-11}$                                                                                                             | $6.20 \times 10^{-11}$                                                                                                                                                     |
| 300.0   | $7.06 \times 10^{-11}$                                                                                                                                                            | $9.56 \times 10^{-11}$                                                                                                             | $6.22 \times 10^{-11}$                                                                                                                                                     |
| 310.0   | $7.18 \times 10^{-11}$                                                                                                                                                            | $9.72 \times 10^{-11}$                                                                                                             | $6.32 \times 10^{-11}$                                                                                                                                                     |
| 320.0   | $7.29 \times 10^{-11}$                                                                                                                                                            | $9.88 \times 10^{-11}$                                                                                                             | $6.42 \times 10^{-11}$                                                                                                                                                     |

**Table S8** Rate coefficients ( $\text{cm}^3 \cdot \text{molecule}^{-1} \cdot \text{s}^{-1}$ ) for the reaction of  $\text{SO}_3$  with  $\text{C}_2\text{H}_5\text{OH}$ ,  $\text{C}_2\text{H}_5\text{NH}_2$  and  $2\text{H}_2\text{O}$  calculated by master equation within 212.6-320.0 K<sup>a</sup>

| Catalysts   | Altitude (km)    | 0 km                   |                        |                        |                        |                        |                        | 5 km                   | 10 km                  | 15 km                  |
|-------------|------------------|------------------------|------------------------|------------------------|------------------------|------------------------|------------------------|------------------------|------------------------|------------------------|
|             | <i>T</i> (K)     | 280.0 K                | 290.0 K                | 298.0 K                | 300.0 K                | 310.0 K                | 320.0 K                | 259.3 K                | 229.7 K                | 212.6 K                |
| Channel R1a | $k_{\text{R1a}}$ | $5.46 \times 10^{-18}$ | $5.63 \times 10^{-18}$ | $5.81 \times 10^{-18}$ | $5.86 \times 10^{-18}$ | $6.16 \times 10^{-18}$ | $6.54 \times 10^{-18}$ | $5.58 \times 10^{-18}$ | $6.27 \times 10^{-18}$ | $7.41 \times 10^{-18}$ |
| Channel R2a | $k_{\text{R2a}}$ | $2.89 \times 10^{-15}$ | $3.52 \times 10^{-15}$ | $4.10 \times 10^{-15}$ | $4.25 \times 10^{-15}$ | $5.07 \times 10^{-15}$ | $5.97 \times 10^{-15}$ | $3.11 \times 10^{-15}$ | $2.89 \times 10^{-15}$ | $3.87 \times 10^{-15}$ |
| Channel a   | $k_{\text{a}}$   | $3.22 \times 10^{-12}$ | $2.79 \times 10^{-12}$ | $2.48 \times 10^{-12}$ | $2.41 \times 10^{-12}$ | $2.09 \times 10^{-12}$ | $1.81 \times 10^{-12}$ | $4.24 \times 10^{-12}$ | $6.32 \times 10^{-12}$ | $7.81 \times 10^{-12}$ |

<sup>a</sup>  $k_{\text{R1a}}$ ,  $k_{\text{R2a}}$  and  $k_{\text{a}}$  was respectively denoted the rate coefficients for the  $\text{SO}_3 + \text{C}_2\text{H}_5\text{OH}$ ,  $\text{SO}_3 + \text{C}_2\text{H}_5\text{NH}_2$  and  $\text{SO}_3 + 2\text{H}_2\text{O}$  reactions.

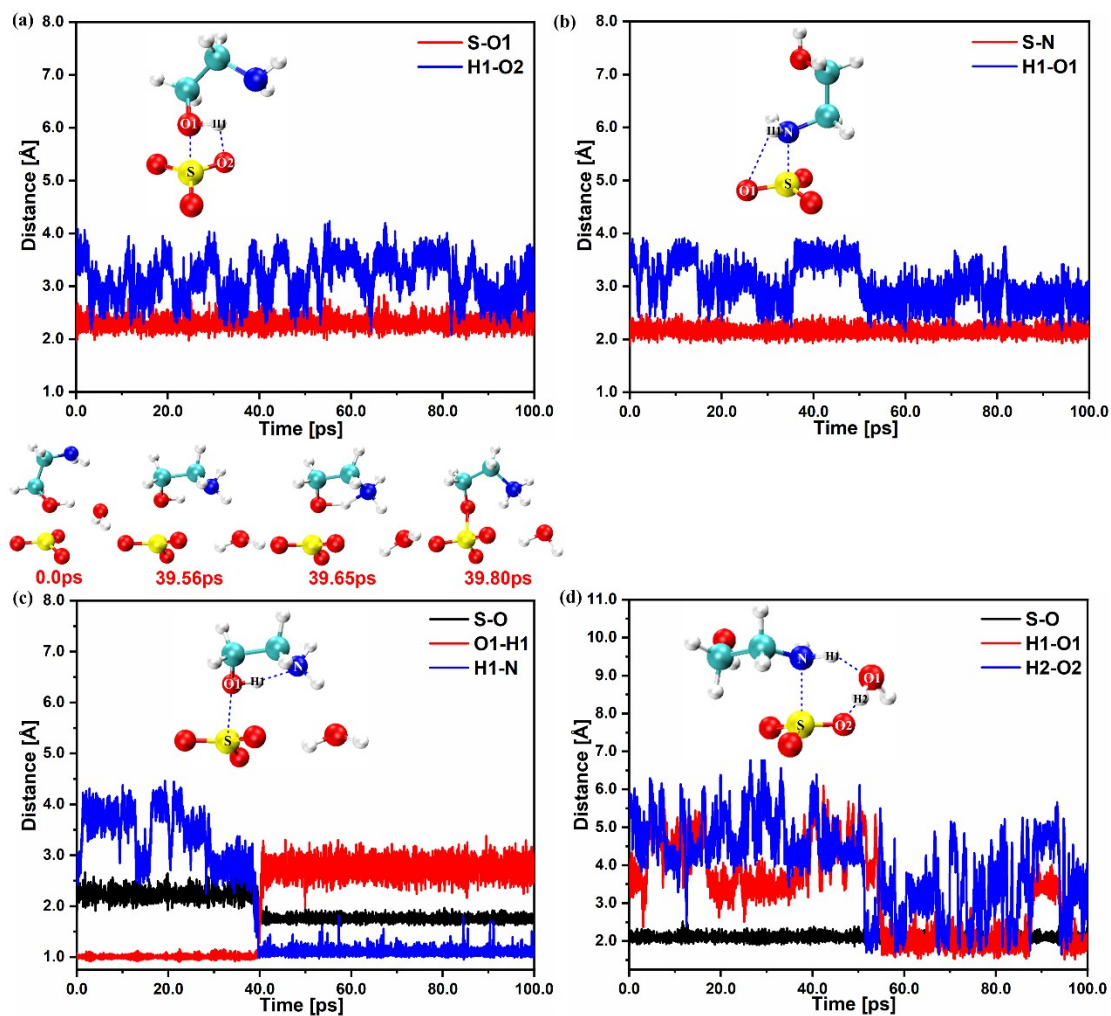

**Fig. S6** The dynamic trajectories of the gas-phase reaction of  $\text{SO}_3$  with  $\text{OH}$  and  $\text{NH}_2$  moieties of MEA without and with  $\text{H}_2\text{O}$  (The white, red, yellow, gray and blue spheres represent H, O, S, C and N atoms, respectively.)

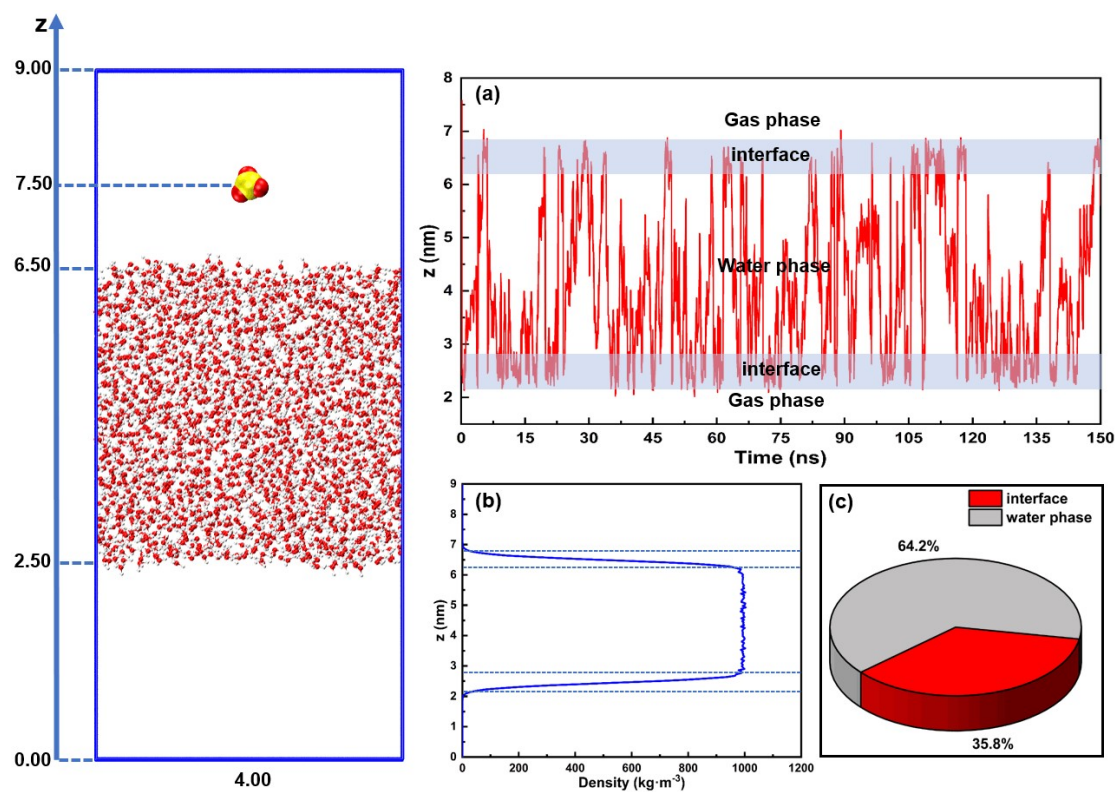

**Fig. S7** The z coordinates of SO<sub>3</sub> as the function of simulation time (a) the z coordinates of SO<sub>3</sub> molecule as the function of simulation time; (b) the density profile of water and (c) the pie chart with the occurrence percentages of SO<sub>3</sub> molecule at the air-water interface and in water phase

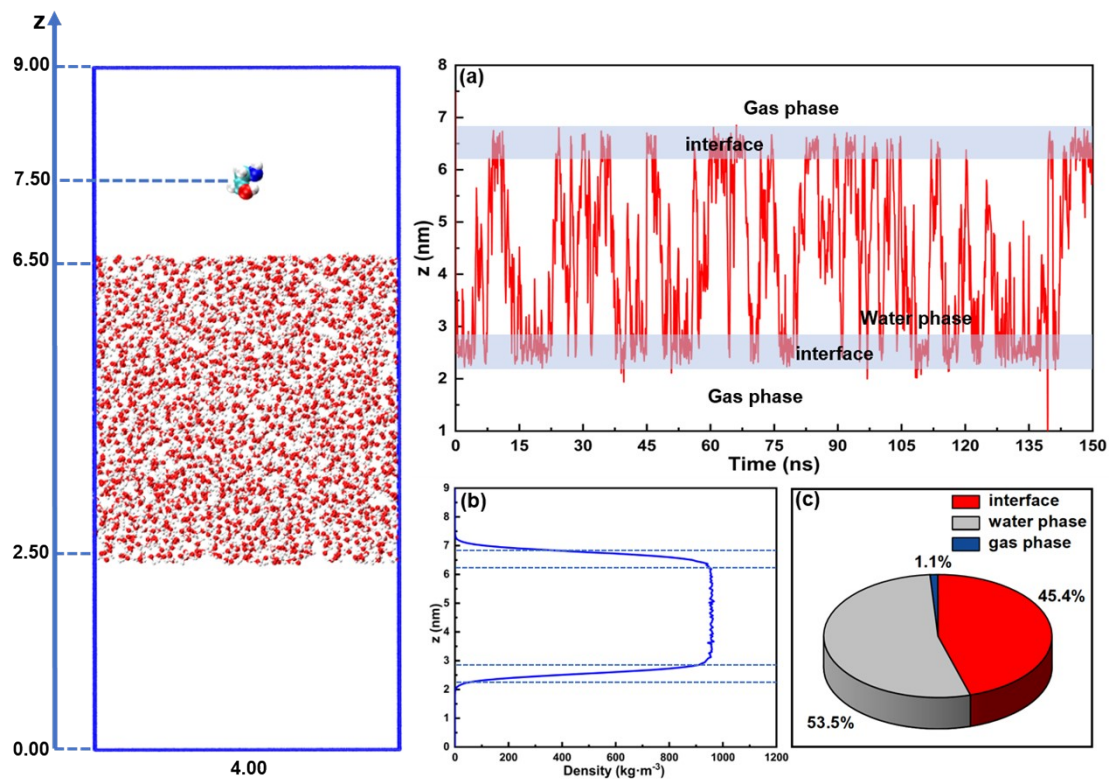

**Fig. S8** The z coordinates of MEA as the function of simulation time (a) the z coordinates of MEA molecule as the function of simulation time; (b) the density profile of water and (c) the pie chart with the occurrence percentages of MEA molecule at the air-water interface, in water phase and gas phase

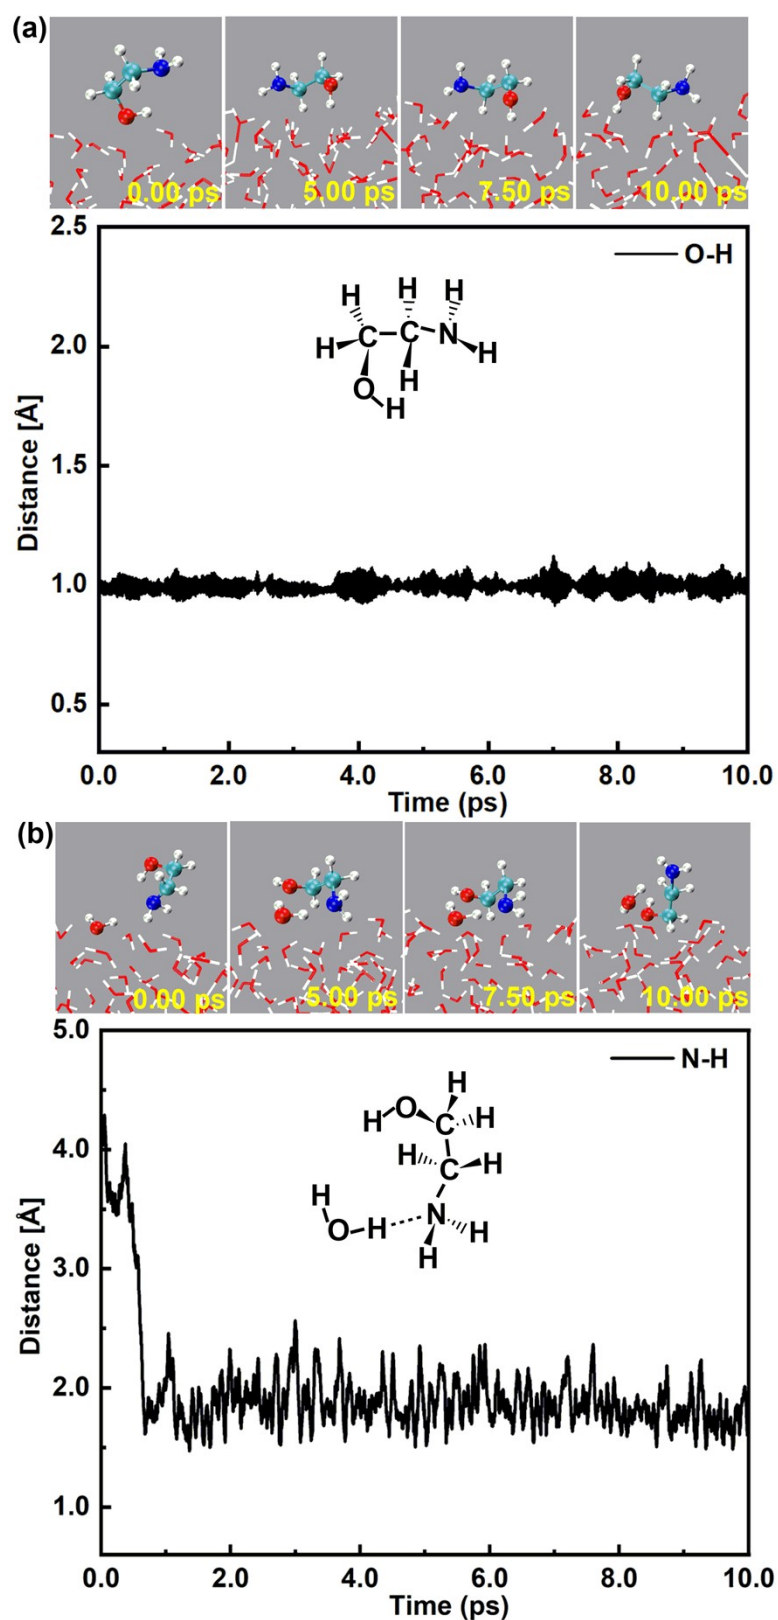

**Fig. S9** The simulated trajectories of the formation of  $\text{HOCH}_2\text{CH}_2\text{NH}_2$  and  $\text{NH}_2\text{CH}_2\text{CH}_2\text{OH}$  molecules on water droplet (The white, red, yellow, cyan, and blue spheres represent H, O, S, C and N atoms, respectively.)

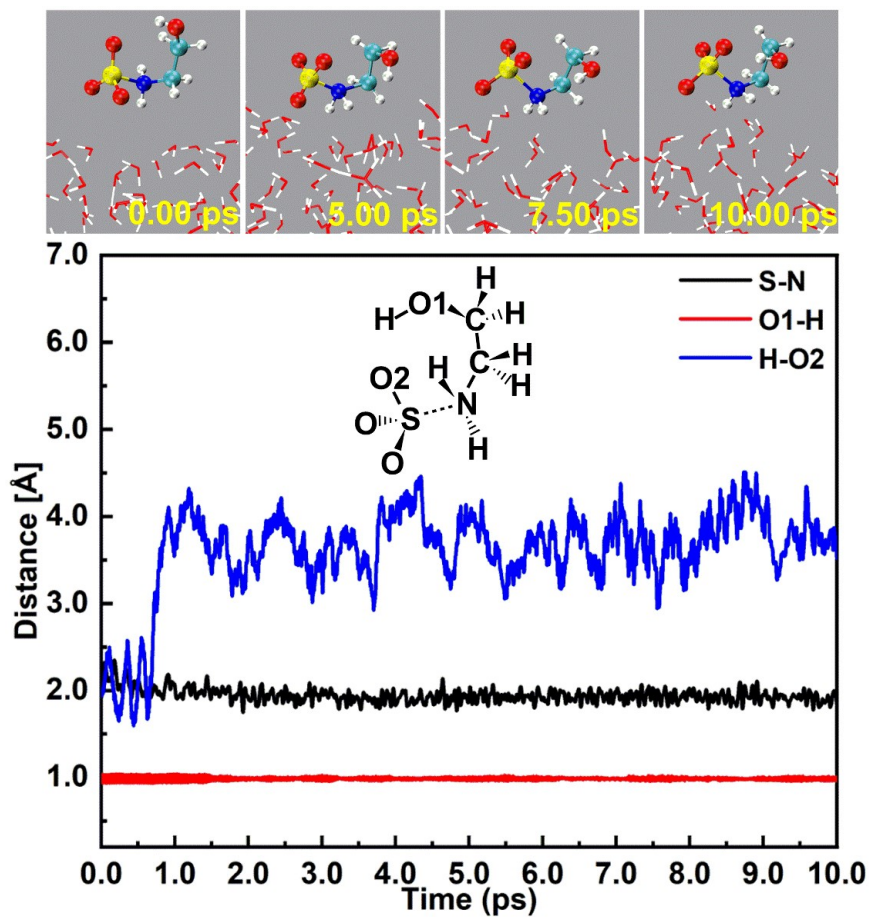

**Fig. S10** The simulated trajectories of the formation of  $\text{SO}_3\text{-NH}_2\text{CH}_2\text{CH}_2\text{OH}$  molecule on water droplet (The white, red, yellow, cyan, and blue spheres represent H, O, S, C and N atoms, respectively.)



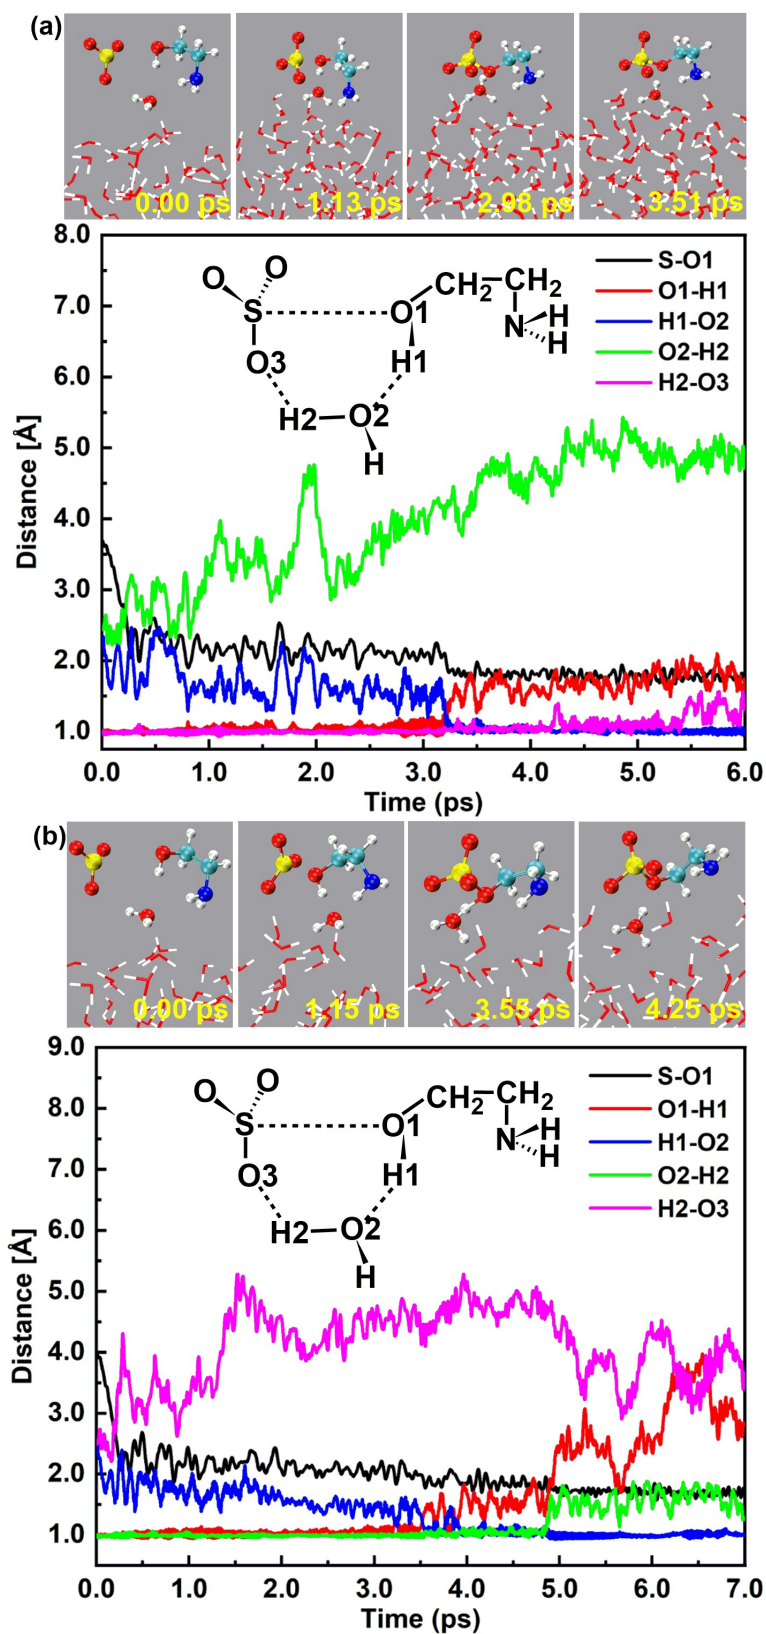

**Fig. S11** BOMD simulation trajectories and snapshots of  $\text{NH}_2\text{CH}_2\text{CH}_2\text{SO}_4^- \cdots \text{H}_3\text{O}^+$  ion pair from the reaction between  $\text{SO}_3$  and  $\text{HOCH}_2\text{CH}_2\text{NH}_2$  with one interfacial water molecule on water droplet (The white, red, yellow, cyan, and blue spheres represent H, O, S, C and N atoms, respectively.)

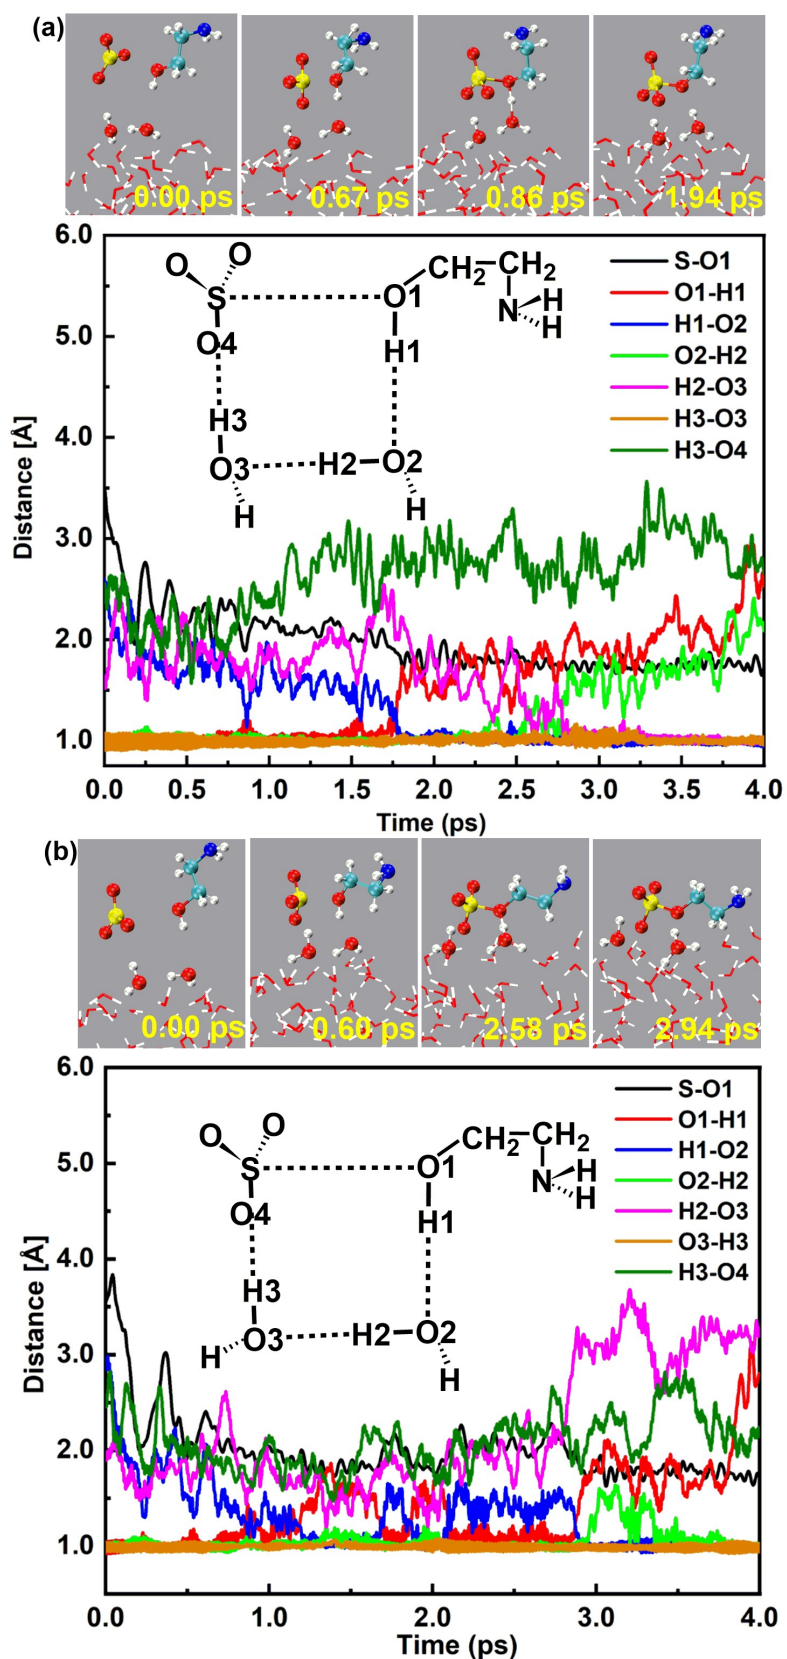

**Fig. S12** BOMD simulation trajectories and snapshots of  $\text{NH}_2\text{CH}_2\text{CH}_2\text{SO}_4^- \cdots \text{H}_3\text{O}^+$  ion pair from the reaction between  $\text{SO}_3$  and  $\text{HOCH}_2\text{CH}_2\text{NH}_2$  with two interfacial water molecules on water droplet (The white, red, yellow, cyan, and blue spheres represent H, O, S, C and N atoms, respectively.)

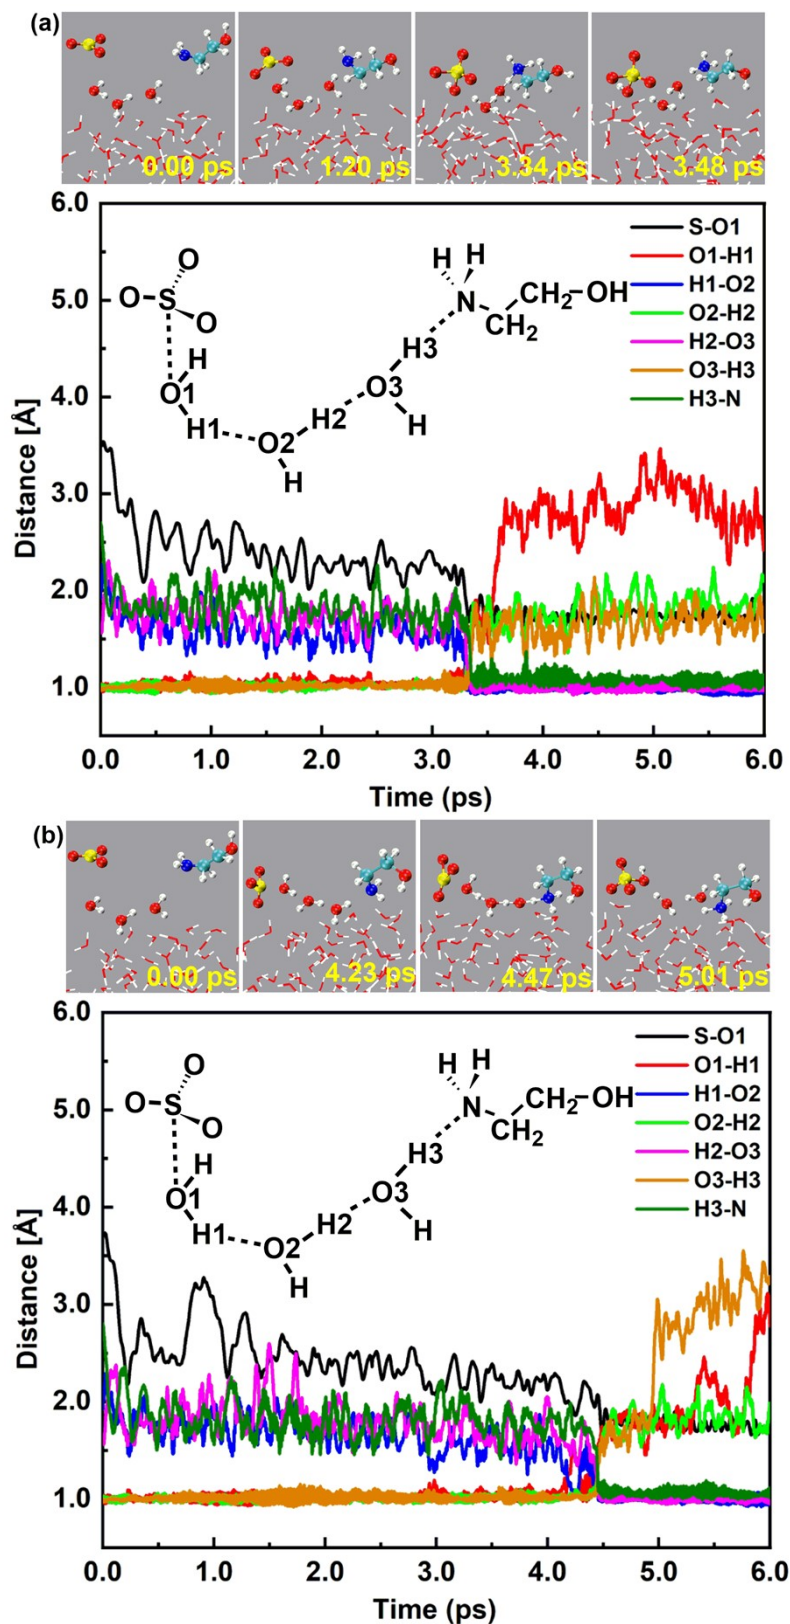

**Fig. S13** BOMD simulation trajectories and snapshots of  $\text{HSO}_4^-$  and  $\text{HOCH}_2\text{CH}_2\text{NH}_3^+$  ion from  $\text{SO}_3$ ,  $\text{HOCH}_2\text{CH}_2\text{NH}_2$  and three interfacial water molecules on water droplet (The white, red, yellow, cyan, and blue spheres represent H, O, S, C and N atoms, respectively.)

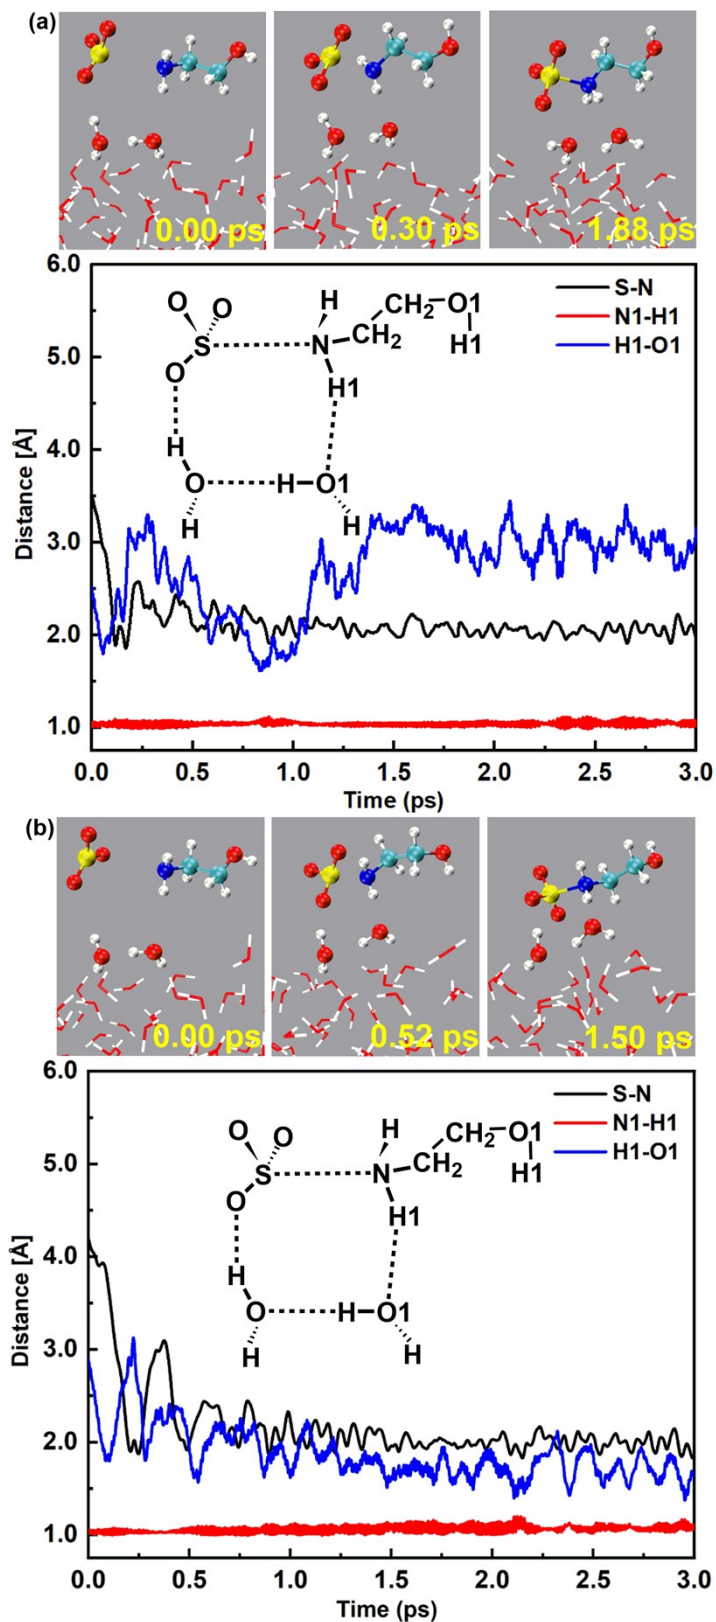

**Fig. S14** BOMD simulation trajectories and snapshots of  $\text{HOCH}_2\text{CH}_2\text{NH}_2^+\text{-SO}_3^-$  ion pair from the reaction between  $\text{SO}_3$  and  $\text{HOCH}_2\text{CH}_2\text{NH}_2$  on water droplet (The white, red, yellow, cyan, and blue spheres represent H, O, S, C and N atoms, respectively.)

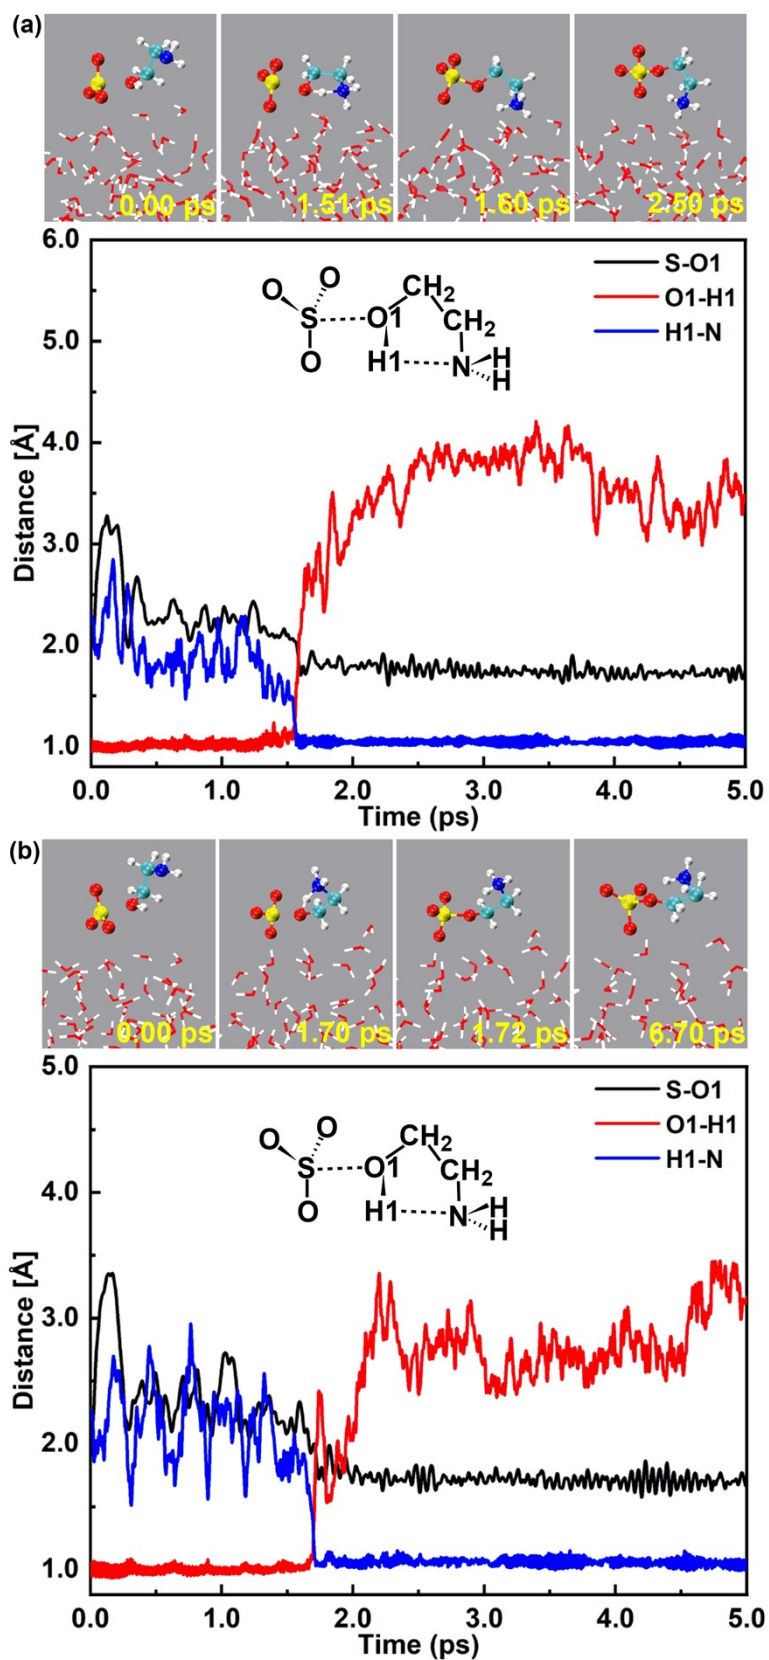

**Fig. S15** BOMD simulation trajectories and snapshots of  $\text{SO}_3^-$ - $\text{OCH}_2\text{CH}_2\text{NH}_3^+$  ion pair from the  $\text{SO}_3$ - $\text{HOCH}_2\text{CH}_2\text{NH}_2$  complex on water droplet (The white, red, yellow, cyan, and blue spheres represent H, O, S, C and N atoms, respectively.)

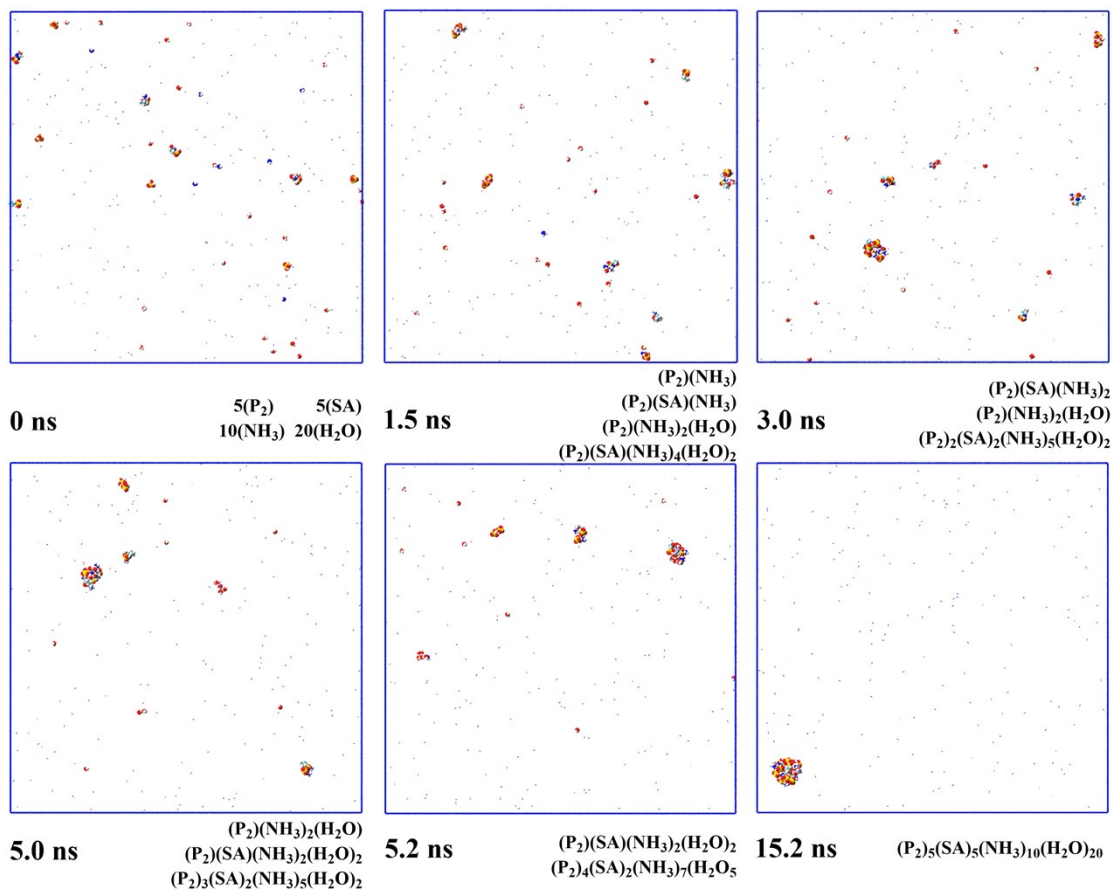

**Fig. S16** Snapshots of the nucleation simulation from the product of reaction of SO<sub>3</sub> with NH<sub>2</sub> moiety of HOCH<sub>2</sub>CH<sub>2</sub>NH<sub>2</sub>
